# Supplementary material for: Abemaciclib, a CDK4/6 inhibitor, exerts preclinical activity against aggressive germinal center‐derived B‐cell lymphomas
Source: PubMed Central journal article supplement — Cancer Sci. 2020 Jan 13;111(2):749–59. doi: 10.1111/cas.14286 (PMC7004541; doi:10.1111/cas.14286), 2020-01-13
Supplement: CAS-111-749-s001.pdf [file CAS-111-749-s001.pdf]

**Supplementary Table 1: PCR primers for Exon 5 in *CCND3***

CCND3\_F CCTAACCTCCCCAGACTTCC  
CCND3\_R AGCTTGACTAGCCACCGAAA

**Supplementary Table 2: Sanger sequencing analysis of Exon 5 of CCND3 (NM\_001760) in cell line analysed in this study**

| <b>Cell line</b> | <b>Amino acid change 1</b> | <b>Nucleotide change 2</b>        |
|------------------|----------------------------|-----------------------------------|
| Gumbus           | p.T283A                    | c.847A>G                          |
| BL41             | p.S259fs                   | c.775_841delinsGCCCAGACCATCTCCAGC |
| BL67             | p.R271fs                   | c.811_812insC                     |
| BL70             | p.K268fs                   | c.801_802insC                     |
| SUDHL10          | p.I290T                    | c.869T>C                          |

positions according to NP\_001751

positions according to coding sequence of NM\_001760

**Supplementary Table 3: The frequency of mutations in D-type Cyclins from previous reports.**

| Reference                    | Gene         | BL                      | BCL-U     | HGBL,<br>DTH | HGBL,<br>NOS | DLBCL      |           |            |
|------------------------------|--------------|-------------------------|-----------|--------------|--------------|------------|-----------|------------|
|                              |              |                         |           |              |              | GCB        | Un        | ABC        |
| Schmitz R, 2012, Nature      | <i>CCND3</i> | 14.6 (124)              |           | ND           |              | 1.9 (158)  | ND        | 10.7 (133) |
| Momose S, 2015, Leukemia     | <i>CCND3</i> | 25.8 (31)               | 33.3 (24) | 29.2 (24)    | 22.2 (9)     | 15.9 (44)  |           | ND         |
| Reddy A, 2017, Cell          | <i>CCND3</i> |                         | ND        |              |              | 2.2 (315)  | 6.3 (128) | 3.2 (310)  |
| Rohde M, 2017, Haematologica | <i>CCND3</i> | 35.4 (65 <sup>#</sup> ) | 14.3 (7)  | NA           | NA           |            | 15.4(13)  |            |
| Bouska A, 2017, Blood        | <i>CCND3</i> | 28.8 (52 <sup>*</sup> ) |           |              |              |            | ND        |            |
| Karube K, 2017, Leukemia     | <i>CCND3</i> |                         | ND        |              |              | 1.3        | 0.7       | 3.3        |
| Shipp MA, 2018, Nat Med      | <i>CCND1</i> |                         |           |              |              | 0 (45)     |           | 0 (50)     |
|                              | <i>CCND2</i> |                         | ND        |              |              | 0 (45)     | ND        | 0 (50)     |
|                              | <i>CCND3</i> |                         |           |              |              | 4.4(45)    |           | 8 (50)     |
| Schmitz R, 2018, NEJM        | <i>CCND1</i> |                         |           |              |              | 0.6        | 0         | 0          |
|                              | <i>CCND2</i> |                         | ND        |              |              | 0.6        | 2.6       | 0.7        |
|                              | <i>CCND3</i> |                         |           |              |              | 6.7        | 9.6       | 11.9       |
| Ennishi D, 2019, JCO         | <i>CCND3</i> |                         | ND        |              |              | 12.1 (157) |           | ND         |

ND: not done or not analyzed (available), #: including leukemic BL, \*: denoted as molecular BL, abbreviations; BCL-U: B-cell lymphoma, unclassifiable, with features intermediate between DLBCL and BL ‘former disease category in WHO 4th ed) “  
HGBL\_DTH: High-Grade B-Cell Lymphoma, with *MYC* and *BCL2* and/or *BCL6* translocation, HGBL\_NOS: High-Grade B-Cell Lymphoma, not otherwise specified , GCB: germinal center B-cell-like, ABC: activated B-cell-like, Un: unclassifiable. Parenthesis indicates the number of analyzed cases.
